# Supplementary material for: Evolution of transcriptional regulation of histidine metabolism in Gram-positive bacteria
Source: PubMed Central journal article supplement (PMC9413887; doi:10.1186/s12864-022-08796-y), 2022-08-25

Additional file 1. Maximum-likelihood phylogenetic tree for the HisR proteins in studied genomes.

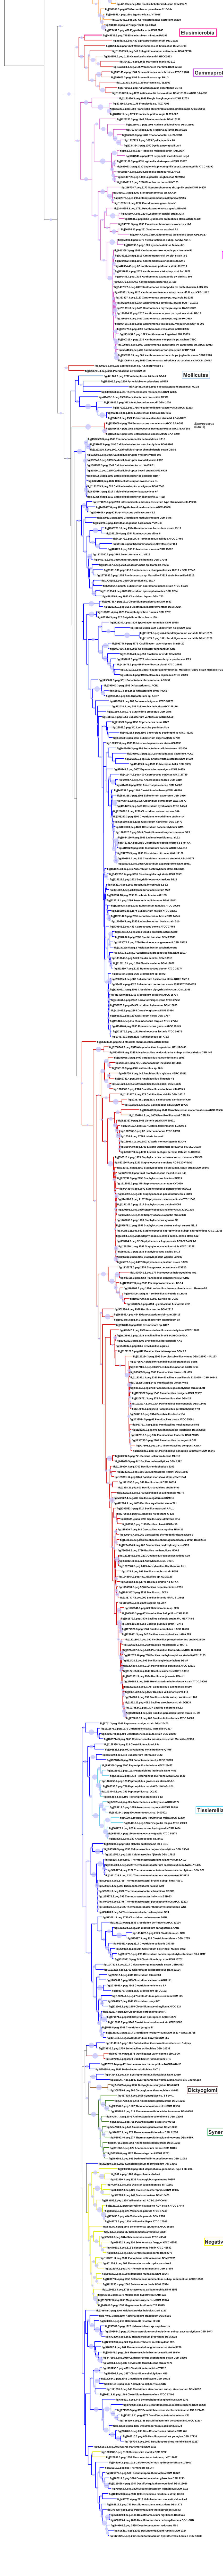

Supplement: 12864_2022_8796_MOESM1_ESM.pdf [file 12864_2022_8796_MOESM1_ESM.pdf]
