# Supplementary material for: Evolution of transcriptional regulation of histidine metabolism in Gram-positive bacteria
Source: PubMed Central journal article supplement (PMC9413887; doi:10.1186/s12864-022-08796-y), 2022-08-25
Supplement: 12864_2022_8796_MOESM6_ESM.pdf [file 12864_2022_8796_MOESM6_ESM.pdf]

**Additional File 6. Phylogenetic footprinting of upstream regions of genes controlled by candidate Histidine-dependent translational attenuators (see legend below).**

**A. Novel candidate His attenuator upstream of the *hisZGDBHAFIEJ* operon in the *Bacillus cereus* group (Bacillales).**

**222523.1.peg.1517** *Bacillus cereus* ATCC 10987  
**527024.3.peg.2634** *Bacillus thuringiensis* serovar *tochigiensis* BGSC 4Y1  
**1245029.3.peg.3591** *Bacillus anthracis* str. *Carbosap*  
**315730.11.peg.1914** *Bacillus weihenstephanensis* KBAB4  
**526997.3.peg.1686** *Bacillus mycoides* DSM 2048  
**315749.8.peg.1198** *Bacillus cytotoxicus* NVH 391-98

```

-35 box Promoter  -10 box           Leader RBS       Leader start           His codons  Stop
315730.11.peg.1914 tatttacattcagaattaactgttatataaatatgttaaaaaatcagaggagaaaaggaggtaagtattATGAATATCGTGCAATCTATTAAATGCTTACAAAACTACATCATACATATGA
526997.3.peg.1686 tatttacattcggaattaactgttatataaatatgttaaaaaatcagaggagaaaaggaggtaagtattATGAATATCGTGCAATCTATTAAATGCTTACAAAATTACATCATACATATGA
527024.3.peg.2634 tatttacattcagaattaagtgttatataactatgttaaaaa-ttagaggagaaaaggaggtaagtattATGAAAACAATGCAATCTATTAAATGCTTACACAACTACATCATACATATAA
1245029.3.peg.3591 tatttacattcagaattatgtgttatataactatgttaaaaa-ttagaggagaaaaggaggtaagtattATGAAAACAATGCAATCTATTAAATGCTTACACAACTACATCATACAGTAA
222523.1.peg.1517 tatttacattcagaattaagtgttatataactatgttaaaaa-ttagaggagaaaaggaggtaagtattATGAAAACAATGCAATCTATTAAATGCTTACACAACTACATCATACATATAA
315749.8.peg.1198 tatttacttttctgaatagttgttatataaatgtgtgaaaa-taagcggagaaaaggaggtaaggattATGTTTGCAATGAAGTGATAAATATGCTTACAAAACTACACCATCATCCATAA
***** ** * ***** ** * * * * * * * * * * * * * * * * * * * * * * * * * * * * * * * * * * * * * * * * * * * * * * * * *

```

```

Attenuator hairpin           terminator hairpin
315730.11.peg.1914 aacccttgaacctaacgtgaaa-acgtgtagggacaagggttattcccgtgttacctacactcactactaaa-gagccttgtaggta--ttttgtctacaaggctctttt
526997.3.peg.1686 aacccttgaacctaacgtgaaa-acgtgtagggacaagggttattcccgtgttacctacactcactactaaa-gagccttgtaggta--ttttgtctacaaggctctttt
527024.3.peg.2634 aacccttgaacctagcgtgaaa-acgtgtaggtgcaagggttattcccgtgttacctactcgctactaaa-gagccttgtaggta--ttttgtctacaaggctctttt
1245029.3.peg.3591 agcccttgaacctaacgtgaaa-acgtgtaggtgcaagggttattcccgtgttacctacacgcctacgaaa-gagccttgtaggta--ttttgtctacaaggctctttt
222523.1.peg.1517 agcccttgaacctagcgtgaaa-acgtgtaggtgcaagggttattcccgtgttacctacacgcctactaaa-gagccttgtaggta--ttttgtctacaaggctctttt
315749.8.peg.1198 aacccttgctcctagcgtgaaaacgtgtaggtacaagggttattcctgtgttacctacactctataaaaa-gagccttgtaggta--ttttgtctadaaggctcttt
* * * * * * * * * * * * * * * * * * * * * * * * * * * * * * * * * * * * * * * * * * * * * * * * * * * * * * * * * * * * * *

```

```

hisZ gene start
315730.11.peg.1914 tttttcggtttgggtggatggaatgg-cataaattaaagaggggaagggtgtgtgaattcagATGACAAAGTGGAAACGGGCAAATCCGAATGGAACGAG
526997.3.peg.1686 tttttcggtttgggtggatggaatgggcataaattaaagaggggaagggtgtgtgaattcagATGACAAAGTGGAAACGGGCAAATCCGAATGGAACGAG
527024.3.peg.2634 tttttcggtttaggtgcatgaaataagcatacattagaaagggaaaggtgtgagaatttagATGACAAAATGGAAACGGGCAAACCCAAATGGAACGAG
1245029.3.peg.3591 tttttcggtttaggtgcatgaaataagcatacattagaaagggaaaggtgtgagaatttagATGACAAAATGGAAACGGGCAAACCCAAATGGAACGAG
222523.1.peg.1517 tttttcggtttaggtgcatgaaataagcatacattagaaagggaaaggtgtgagaatttagATGACAAAATGGAAACGGGCAAATCCAAATGGAACGAG
315749.8.peg.1198 ttctttgtttgtgattgtttaggtgagcatatacataaaaaagaaaggg---ggagttagcATGACGAACTGGAGACGTACAAAACCAAATGGAACGAG
* * * * * * * * * * * * * * * * * * * * * * * * * * * * * * * * * * * * * * * * * * * * * * * * * * * * * * * * * *

```

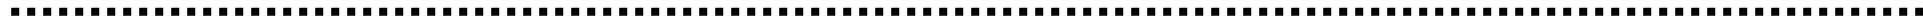



**C. Novel candidate His attenuator upstream of the *hisZGDCBHAF(IE)* operon in the Erysipelotrichales group.**

- 451640.5.peg.1377 **Catenibacterium mitsuokai** DSM 15897
- 1297794.4.peg.3389 **Coprobacillus cateniformis** JCM 10604
- 999415.3.peg.1341 **Eggerthia catenaformis** OT 569 = DSM 20559
- 445974.6.peg.1707 **Erysipelatoclostridium ramosum** DSM 1402
- 69824.3.peg.1410 **[Clostridium] cocleatum** strain DSM 1551
- 428126.7.peg.165 **[Clostridium] spiroforme** DSM 1552

|                    |                 |              |                     |                  |                    |                        |
|--------------------|-----------------|--------------|---------------------|------------------|--------------------|------------------------|
|                    | leader RBS      | leader start | His codons          | Stop             | attenuator hairpin |                        |
| 445974.6.peg.1707  | tacaatgaga-ggtg | ttaattATG    | AAAAACAACA          | CAAAATTTACAATTA- | CATCACCATCAT       | TGGATT--GCCTAG         |
| 69824.3.peg.1410   | tacaatgaga-ggtg | tctaattATG   | AAAAACAATCACA       | AATTTACAACTA-    | CATCACCATCAT       | TGGATT--GCCTAG         |
| 428126.7.peg.165   | tacaatgaga-ggtg | gataaattATG  | AAAAACAATAATTA      | AATTTACAATTA-    | CATCACCATCAT       | TGGATT--GCCTAG         |
| 1297794.4.peg.3389 | aaaatgaggtga    | tatttATG     | AAAAACAATTTTAT      | TATTTACAATTT-    | CATCACCATCAT       | TGGAAC--AACTAG         |
| 999415.3.peg.1341  | aaaaatgaggtga   | tatttATG     | CAAACTATACAGTTA-    | AACAATTT-        | CATCATCACCAT       | TGGCGT--ATTTAG         |
| 451640.5.peg.1377  | aaaactgaggtga   | tatttATG     | AAAAATACAATTTT      | TGTCAACAATTTAC   | CACCATCACCAT       | CGTGGTCTAGTTAG         |
|                    | * * **** * *    | **           | * * * * * * * * * * | ***** ****       | ***** **           |                        |
|                    |                 |              | Terminator hairpin  |                  |                    | <i>hisZ</i> gene start |
| 445974.6.peg.1707  | atthttg-tg      | ttaaatattatt | ttgggtgtatct        | aatgac---aat     | attacttttag-       | cgagtcattagt           |
| 69824.3.peg.1410   | atthttg-tatt    | aaatagtttgg  | gtgtatctaat         | gac---aat        | attacttttag-       | cgagtcattagt           |
| 428126.7.peg.165   | atthttg-tgt     | ataaatttgg   | ttgtatctaat         | gac---aat        | ttgttataaac        | gagtcattagta-          |
| 1297794.4.peg.3389 | atthttg-tgt     | atataaattt   | gggtgtatctg         | atgaggtttat      | atgg-cgagtc        | attaa---gact           |
| 999415.3.peg.1341  | gttttgtttt      | acaattaag    | caaggtgtca--        | atctaat---       | aacactaga          | aacgaggttatt           |
| 451640.5.peg.1377  | gttttgacata     | caactcaaaaa  | acggacacgaa         | acaat---gac      | ataagggaa          | caggtcattg---          |
|                    | **** * **       | *            | *                   | ** **            | ***                | * *                    |

**Legend and Abbreviations:**

To identify candidate His attenuators we applied a phylogenetic footprinting approach to upstream regions of *his* genes using multiple sequence alignment of upstream gene regions for each group of closely-related orthologs. Multiple alignments of DNA upstream regions were obtained by ClustalW2 integrated in the SEED platform. Legend for attenuator elements:

LEADER PEPTIDE    His codons    Stop codon    attenuator hairpin    terminator hairpin    Potential antiterminator    Coding region of downstream gene
